# Supplementary material for: Main chain copolysiloxanes with terthiophene and perylenediimide units: synthesis, characterization and electrical memory
Source: Royal Society of Chemistry journal article supplement (doi:10.1039/c7py00418d), 2017-01-01
Supplement: c7py00418d1.pdf [file c7py00418d1.pdf]

## Supporting Information

### **Main Chain Copolysiloxane with Terthiophene and Perylenediimide Units: Synthesis, Characterization and Electrical Memory**

Zhen Chen,<sup>a</sup> Tingjie Zhang,<sup>a</sup> Yi Zhang,<sup>a</sup> Zhongjie Ren,<sup>a,\*</sup> Jianming Zhang,<sup>b</sup> Shouke  
Yan<sup>a,\*</sup>

<sup>a</sup>State Key Laboratory of Chemical Resource Engineering, Beijing University of  
Chemical Technology, Beijing 100029, China. E-mail: [renzj@mail.buct.edu.cn](mailto:renzj@mail.buct.edu.cn),  
[skyan@mail.buct.edu.cn](mailto:skyan@mail.buct.edu.cn).

<sup>b</sup> Key Laboratory of Rubber-Plastics, Qingdao University of Science & Technology,  
Qingdao, 266042, China.

## **Table of Contents**

|                                                                                                                                                                                                                                     |     |
|-------------------------------------------------------------------------------------------------------------------------------------------------------------------------------------------------------------------------------------|-----|
| Figure S1. <sup>1</sup> HNMR of 1,6,7,12-tetrachloro-N,N'-bis(ethoxydimethylsilyl)propyl-perylene-3,4,9,10-tetracarboxylic acid diimide. ....                                                                                       | S-3 |
| Figure S2. <sup>1</sup> HNMR of 1,6,7,12-tetrachloro-N,N'-bis(hydroxydimethylsilyl)propyl-perylene-3,4,9,10-tetracarboxylic acid diimide .....                                                                                      | S-3 |
| Figure S3. <sup>1</sup> HNMR of 5,5''-bis(dimethylsilyl)-2,2':5',2''-terthiophene. ....                                                                                                                                             | S-4 |
| Figure S4. MALDI-TOF MS of PBIClSi-alt-PTSi.....                                                                                                                                                                                    | S-4 |
| Figure S5. <i>J-V</i> curves of the ITO/ PBIClSi-alt-PTSi /Al memory. (a) positive sweep for the first time; (b) negative sweep for the first time.....                                                                             | S-4 |
| Figure S6. The On and Off state current as a function of device area. ....                                                                                                                                                          | S-5 |
| Figure S7. <i>J-V</i> characteristics of the memory device of ITO/ PBIClSi-alt-PTSi /Au with different film thicknesses. (a) 18 nm; (b) 30 nm; (c) 80 nm; (d) 120 nm; (e) 180 nm.the memory device of ITO/ PBIClSi-alt-PTSi/Au..... | S-5 |
| Figure S8. XPS spectra of PBIClSi-alt-PTSi film with applied 6 V bias and without bias: (a) C1s, (b) N1s, (c) Si2p, (d) S2p.....                                                                                                    | S-6 |
| Figure S9. Configuration of PBIClSi-alt-PTSi with four units optimized by materials studio.....                                                                                                                                     | S-6 |

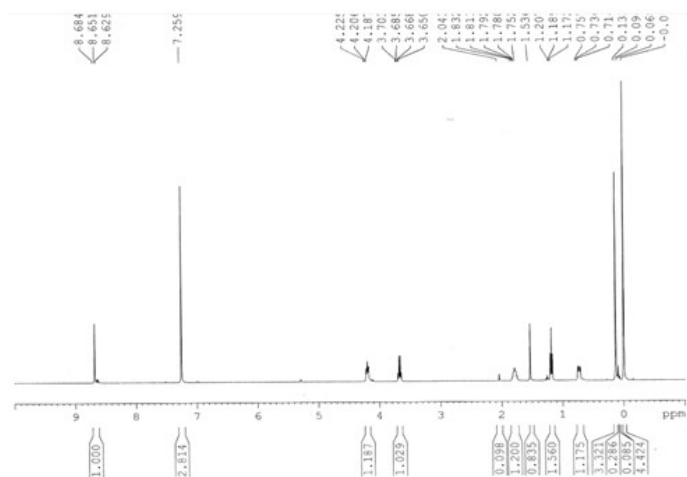

**Figure S1.**  $^1\text{H}$ NMR of 1,6,7,12-tetrachloro- $N,N'$ -bis(ethoxydimethylsilyl)propylperylene-3,4,9,10-tetracarboxylic acid diimide.

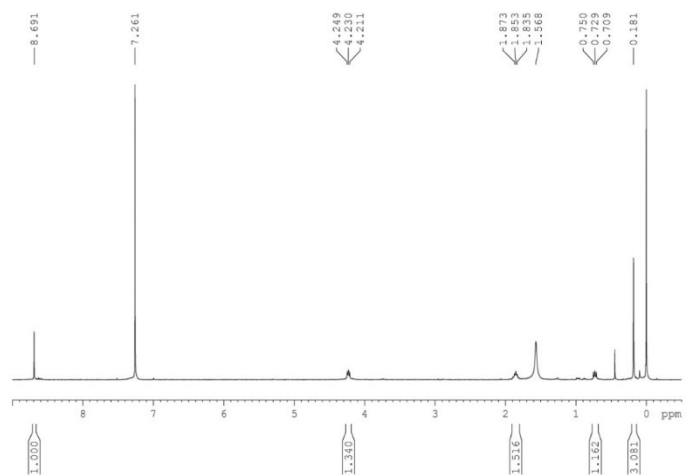

**Figure S2.**  $^1\text{H}$ NMR of 1,6,7,12-tetrachloro- $N,N'$ -bis(hydroxydimethylsilyl)propylperylene-3,4,9,10-tetracarboxylic acid diimide.



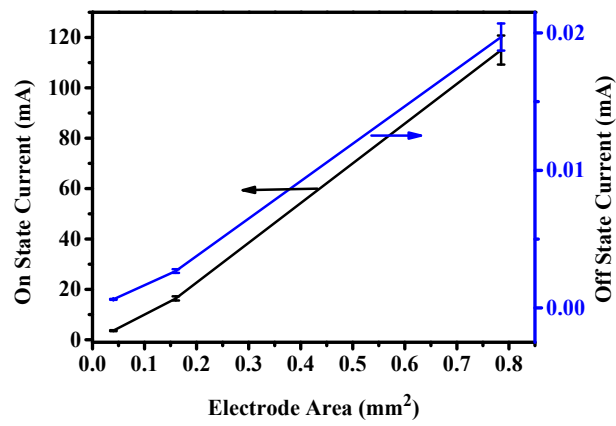

**Figure S6.** The On and Off state current as a function of device area.

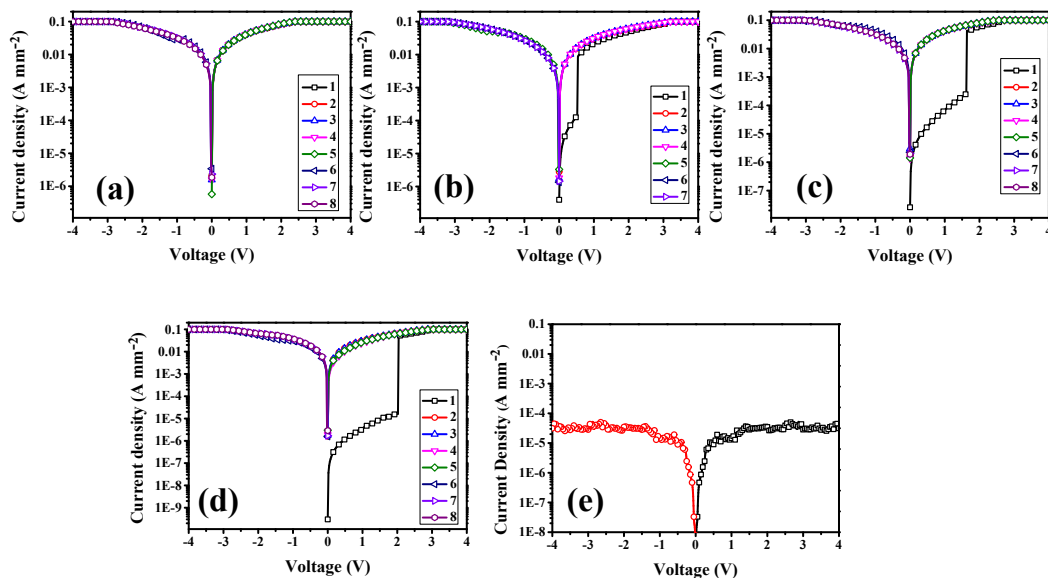

**Figure S7.** *J-V* characteristics of the memory device of ITO/ PBIClSi-alt-PTSi /Au with different film thicknesses. (a) 18 nm; (b) 30 nm; (c) 80 nm; (d) 120 nm; (e) 180 nm.

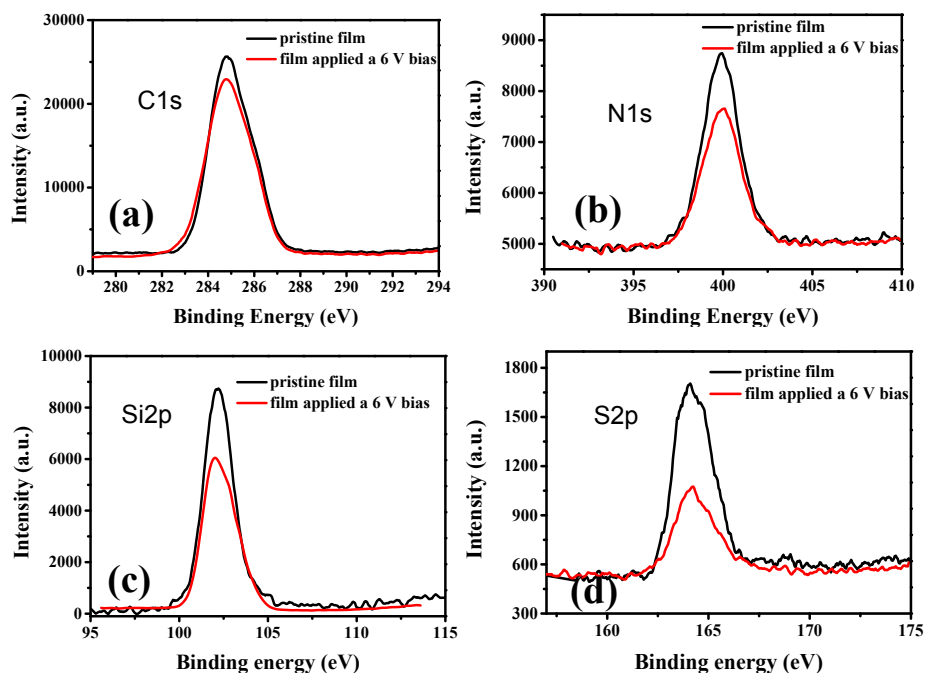

**Figure S8.** XPS spectra of PBIClSi-alt-PTSi film with applied 6 V bias and without bias: (a) C1s, (b) N1s, (c) Si2p, (d) S2p.

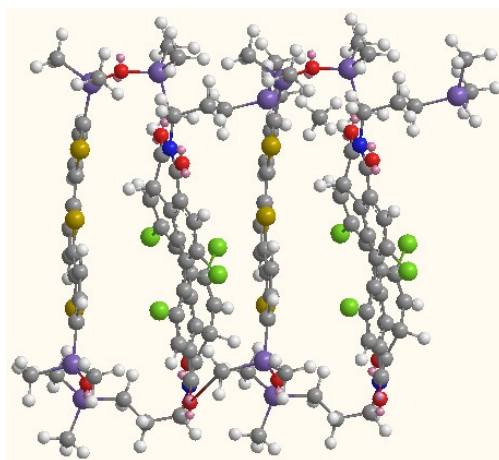

**Figure S9.** Configuration of PBIClSi-alt-PTSi with four units optimized by materials studio.
